# Supplementary material for: Direct Injection of Aluminum–Organic Matter Flocs to Reduce Soil Permeability and Create a Vertical Flow Barrier In Situ
Source: Atypon-hosted journal article supplement (doi:10.1061/(asce)gt.1943-5606.0002886), 2022-09-07
Supplement: supplemental materials_gt.1943-5606.0002886_zhou.pdf [file supplemental%20materials_gt.1943-5606.0002886_zhou.pdf]

## SUPPLEMENTAL MATERIALS

*ASCE Journal of Geotechnical and Geoenvironmental Engineering*

# Direct Injection of Aluminum–Organic Matter Flocs to Reduce Soil Permeability and Create a Vertical Flow Barrier In Situ

J. Zhou, S. Laumann, and T. J. Heimovaara

**DOI:** 10.1061/(ASCE)GT.1943-5606.0002886

© ASCE 2022

[www.ascelibrary.org](http://www.ascelibrary.org)

## Text S1. 1D COLUMN EXPERIMENTS

### Experimental set-up and testing procedure

The column used for the column experiments is made of polyether ether ketone (PEEK), with a height of 22 cm and an inner diameter of 5.4 cm. In order to prevent the spill of sand while allowing the passage of injected Al-OM flocs, circular filters with a diameter of 23.90 mm were placed at both ends of the column. Five pressure sensors were installed at various heights of the column in order to measure the local pressure in the sand column and thus enable the determination of the local hydraulic conductivity continuously. The configuration of the pressure sensors is shown in Figure S1.

The testing procedure is summarised as: 1) packing the column; 2) initial tracer test (using 1 M NaCl solution); 3) injection of the Al-OM floc suspension; 4) resting the column for 1 hour; 5) flushing the column at low flow velocity with background solution (1 mM NaCl) and 6) Extracting the sand material out of the column for visual inspection of floc distribution.

The column is dry-packed with Dorsilit nr. 8 (99.1 % SiO<sub>2</sub>, grain size: 0.3-0.8 mm, average density: 2.63 g/cm<sup>3</sup>, Eurogrit, The Netherlands), with an increase in the sand level of 1 cm at a time. Therefore, the packing of the entire column was divided into 22 steps. The mass of sand in each column is kept as constant at a value of 846.64 g. After the packing, the sand column was connected to a vacuum pump with the aim to remove all air. Subsequently, the sand column was flushed with C O<sub>2</sub> for two times. The column was then saturated by injection of water from the bottom at a low rate, i.e., 3.15 m/d. Tracer test using 1 M of NaCl solution at an injection velocity of 25.2 m/d was performed with each column to determine the respective effective porosity. The effective porosity of the sand column was in the range of 0.37-0.38.

A high-precision syringe pump (260D ISCO, Beun De Ronde, The Netherlands) was used to supply the Al-OM flocs suspension and to perform tracer and flushing test. In order to test the effect of different injection velocities on the hydraulic conductivity reduction, experiments were carried out with four different injection velocities ranging from 12.6 to 66.7 m/d. For each column injection, 2 l of Al-OM flocs suspension at an input concentration of 1 g/l was injected. This

40 corresponds to approximately 10 pore volumes. All injection tests were performed in duplicate.

41 Another set of column experiments was designed to test the effect of different input concen-  
42 tration. In this set of tests, the column was packed with sand took from the field site (grain size  
43 distribution of this sand can be found in Figure S4) and the injection velocity was set at 61.9 m/d.  
44 Al-OM flocs suspension was prepared at concentrations of 0.1, 0.5, 1, 3, and 5 g/l. Due to the  
45 limited availability of field sand, this set of tests was performed without duplicate. Therefore,  
46 results from this set were used qualitatively.

### 47 **Data acquisition and analysis**

48 During the experiments the change in hydraulic conductivity was continuously monitored. The  
49 pressure sensors (measurement interval of 1 s) monitored the pressure drop along the column. The  
50 hydraulic conductivity is calculated by applying the following equation:

$$51 \quad K = \frac{Q}{A} * \frac{L}{dH}$$

52 where Q is the volumetric injection rate [ $L^3/T$ ]; A is the cross-sectional area perpendicular to  
53 the flow [ $L^2$ ], L is the length of the transport length [ $L$ ], and dH is the average gradient between  
54 the two measurement points along the column [ $L$ ].

55 The reduction in hydraulic conductivity (HCR) is calculated as follows:

$$56 \quad HCR = \frac{K_{Ini}}{K_{End}}$$

57 where  $K_{Ini}$  is the initial hydraulic conductivity [ $L/T$ ] and  $K_{End}$  the hydraulic conductivity [ $L/T$ ]  
58 at the end of the injection.

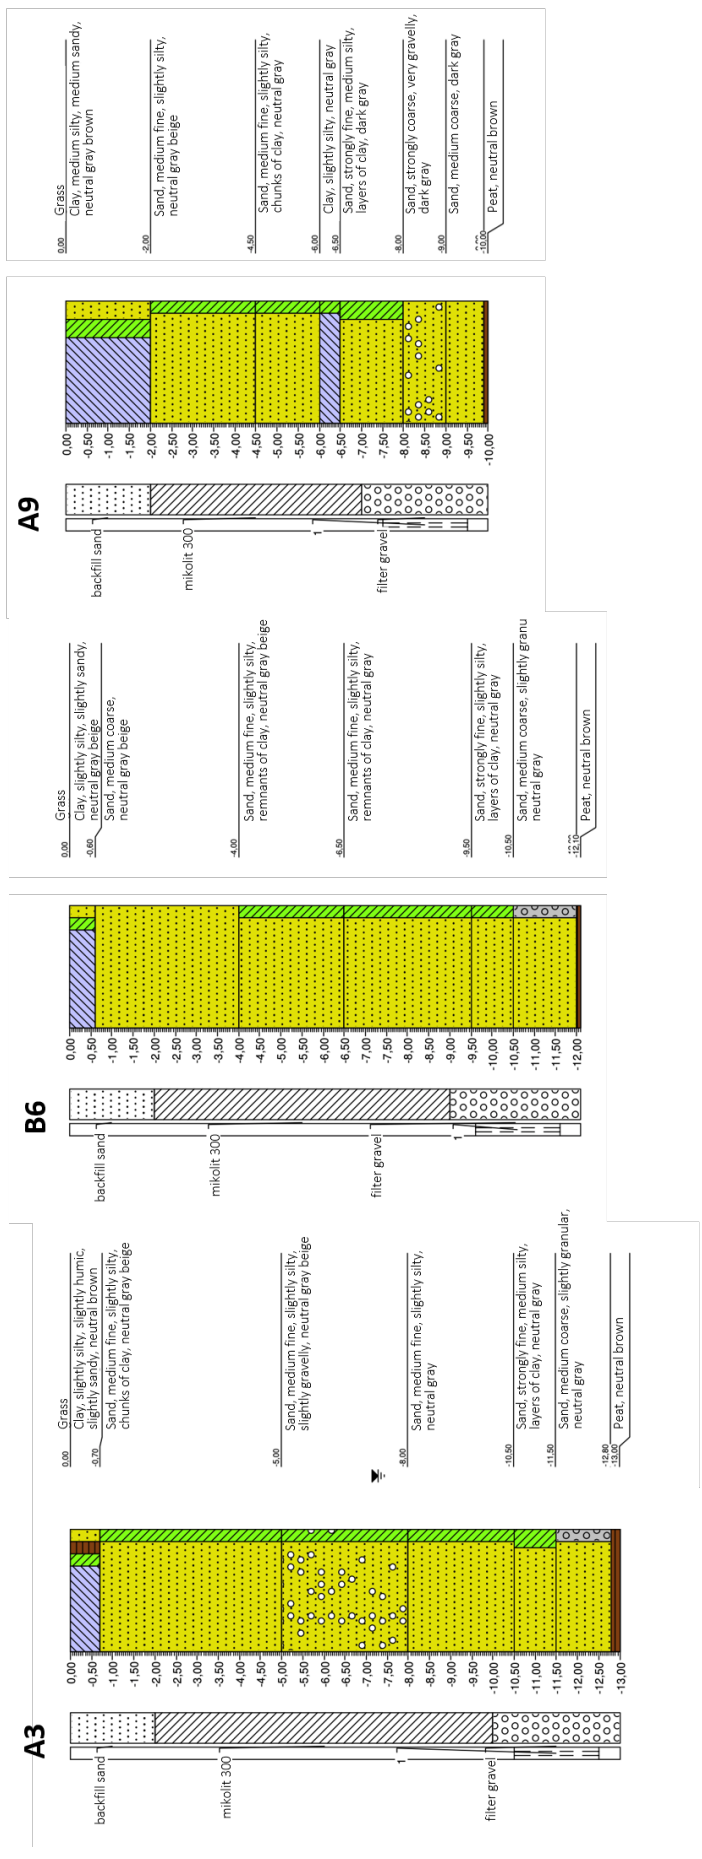

**Fig. S1.** Soil profile at the location of well A3, B6 and A9.



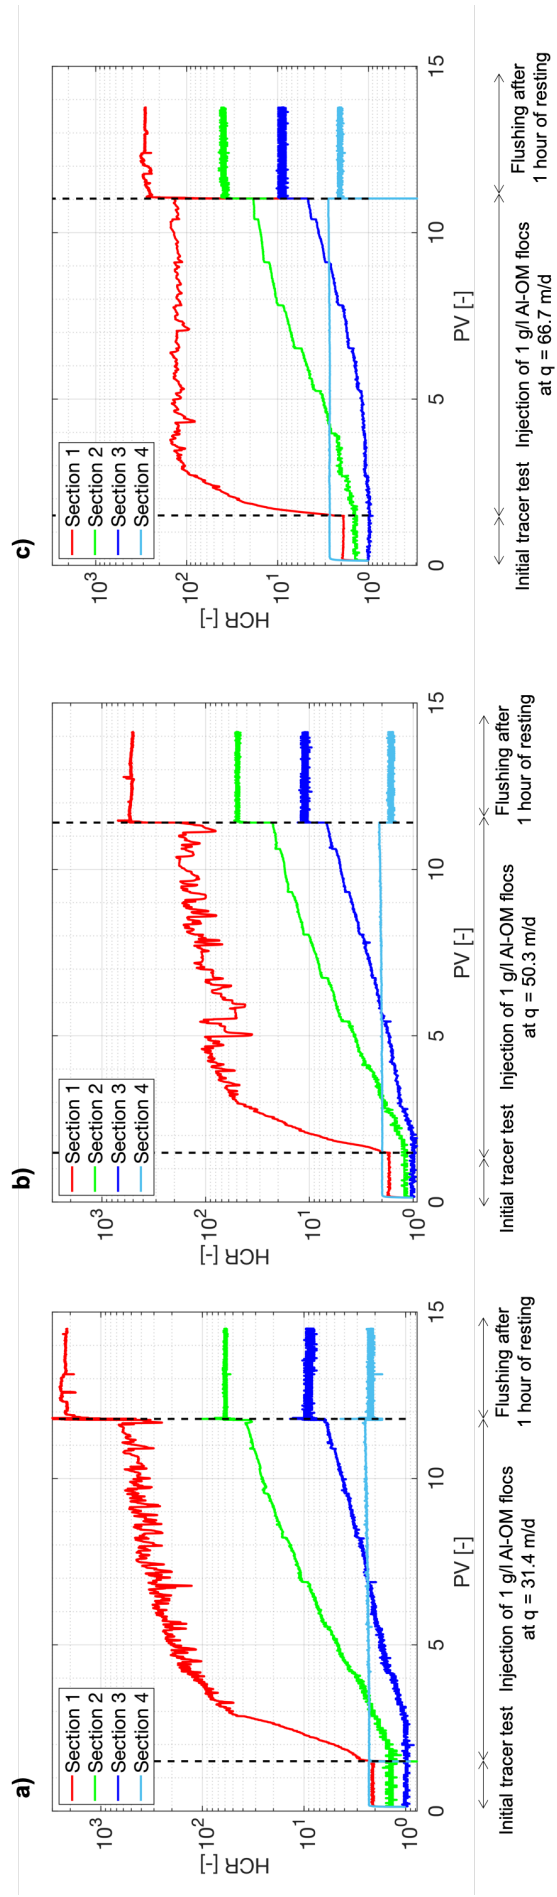

**Fig. S2.** Hydraulic conductivity reduction during water and Al-OM floc injection at the different injection velocities in the different sections of the column.

**TABLE S1.** Summary of model parameters

| Parameters       | Description                                                                    | Value | Units | Notes                                                                          |
|------------------|--------------------------------------------------------------------------------|-------|-------|--------------------------------------------------------------------------------|
| $K_c$            | Hydraulic conductivity of the sand                                             | 6     | m/d   | Derived from falling head tests in the lab with sample recovered from drilling |
| $\varepsilon_c$  | Porosity of the sand                                                           | 0.33  | -     | Representative value                                                           |
| $\alpha$         | van Genuchten parameter of the sand for unsaturated flow                       | 3.2   | 1/m   | Representative value                                                           |
| $n$              | van Genuchten parameter of the sand for unsaturated flow                       | 1.8   | -     | Representative value                                                           |
| $H_{ext,w}$      | External hydraulic head at the water reservoir                                 | 6.5   | m     | Collected from field observation                                               |
| $H_{ext,d}$      | External hydraulic head at the adjacent ditch                                  | 0.5   | m     | Collected from field observation                                               |
| $R_{w,ini}$      | Initial conductance term at the boundary related to the water reservoir        | 0.06  | 1/d   | Fitted against field monitoring data                                           |
| $R_{w,dredging}$ | Conductance term at the boundary related to the water reservoir after dredging | 0.114 | 1/d   | Fitted against field monitoring data                                           |
| $R_d$            | Conductance term at the boundary related to the adjacent ditch                 | 6     | 1/d   | Fitted against field monitoring data                                           |

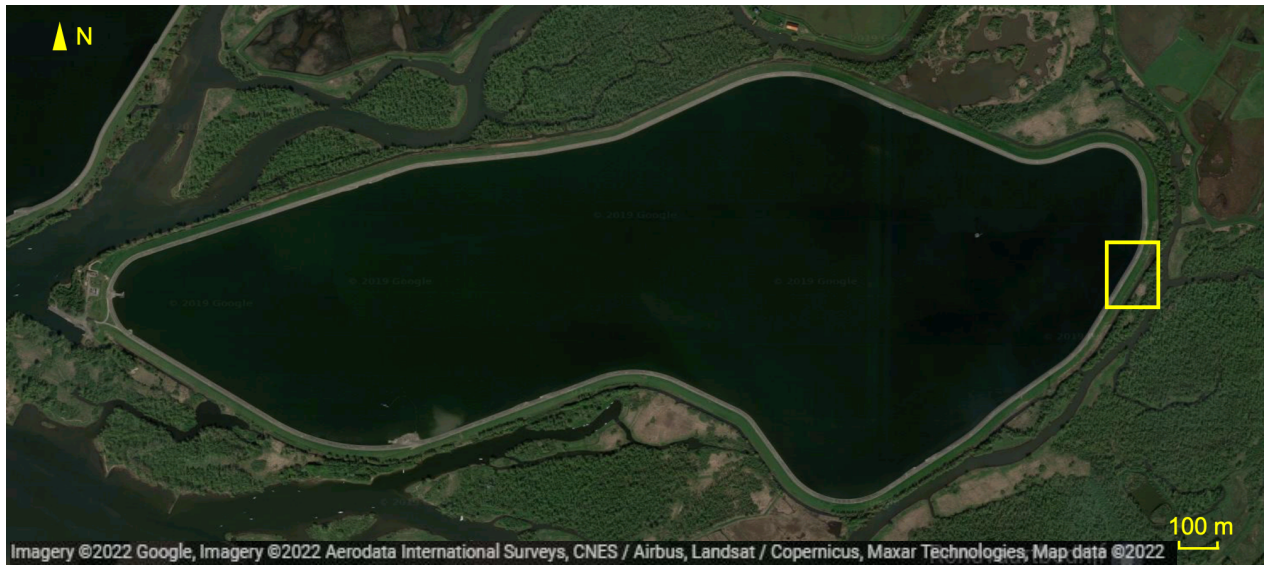

**Fig. S3.** Satellite image of the water reservoir de Gijster and the location of the pilot site (marked in yellow). (Imagery ©2022 Google, Imagery ©2022 Aerodata International Surveys, CNES/ Airbus, Landsat/Copernicus, Maxar Technologies, Map data ©2022.)

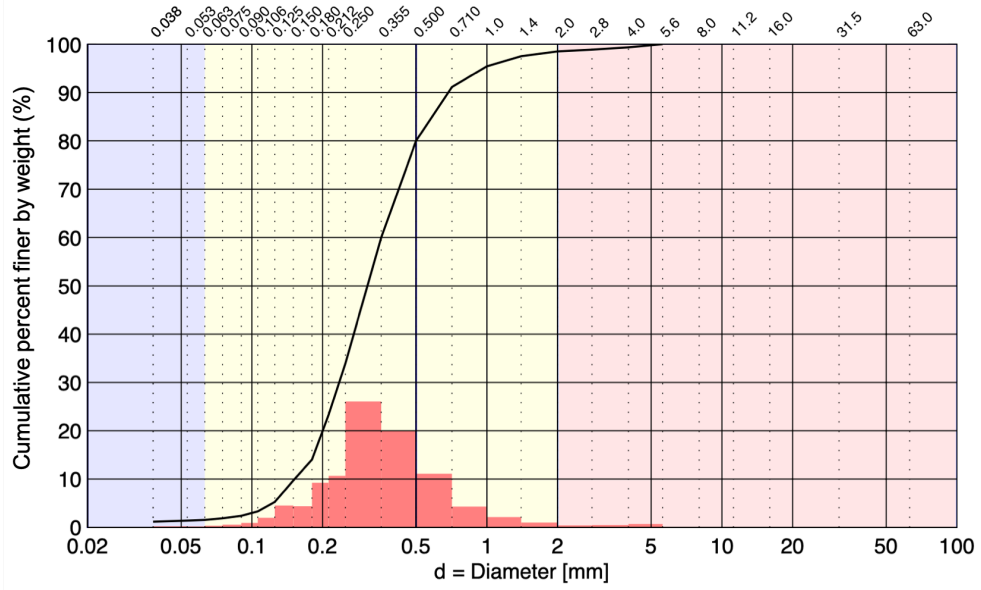

**Fig. S4.** Grain size distribution of sand material took from the field location.

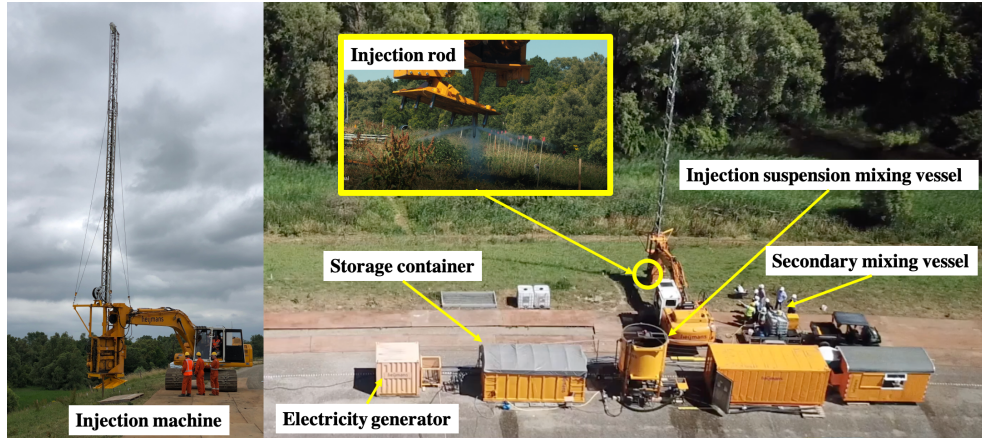

**Fig. S5.** Illustration of the field installation

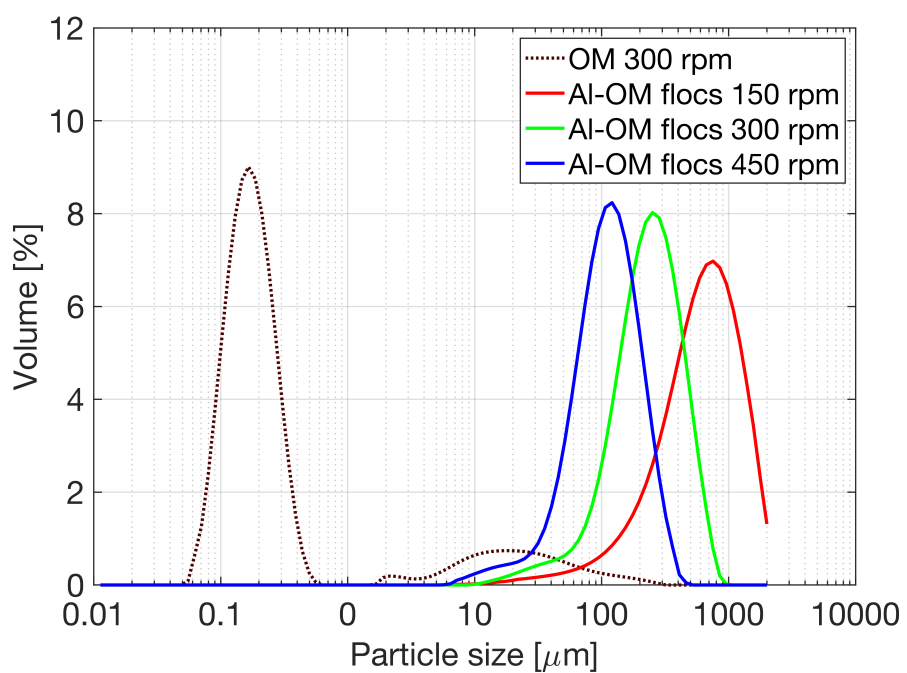

**Fig. S6.** Particle size distribution of the Al-OM flocs under various shear conditions.

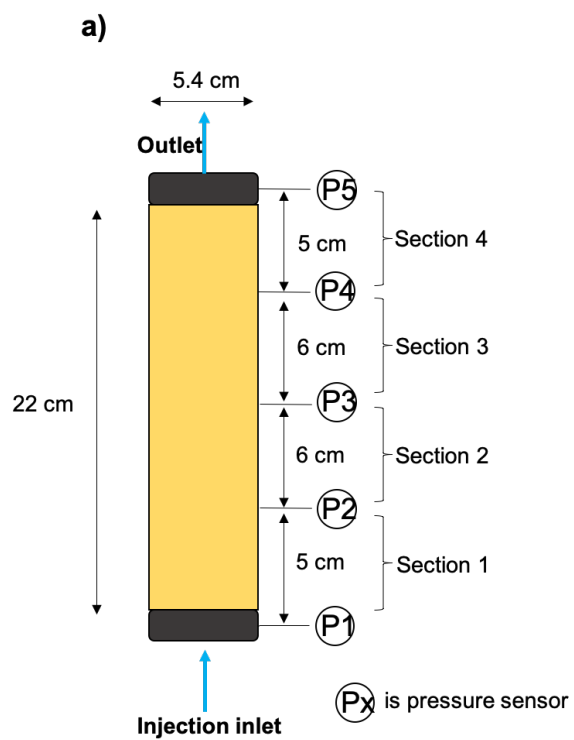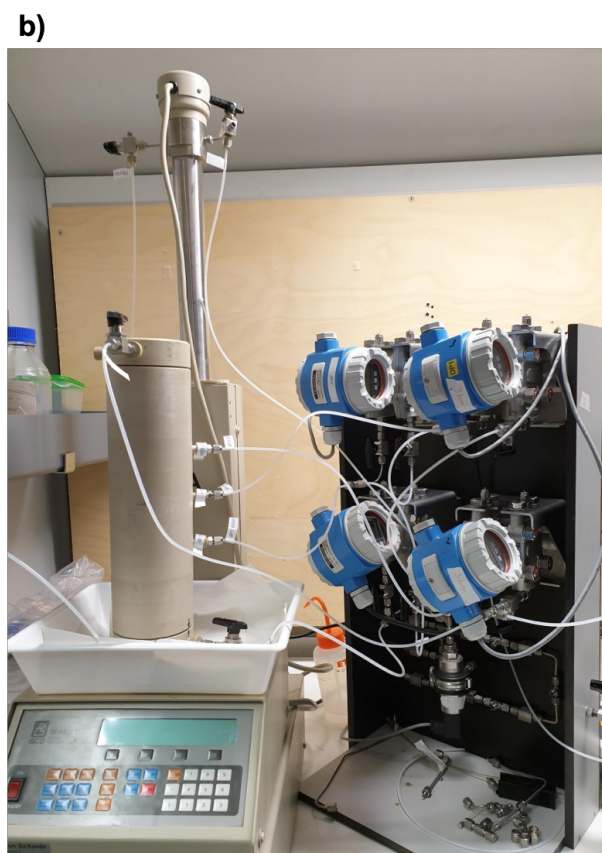

**Fig. S7.** Set-up of the column experiment. a) is the schematic illustration and b) gives a picture of the column with the pressure sensors.

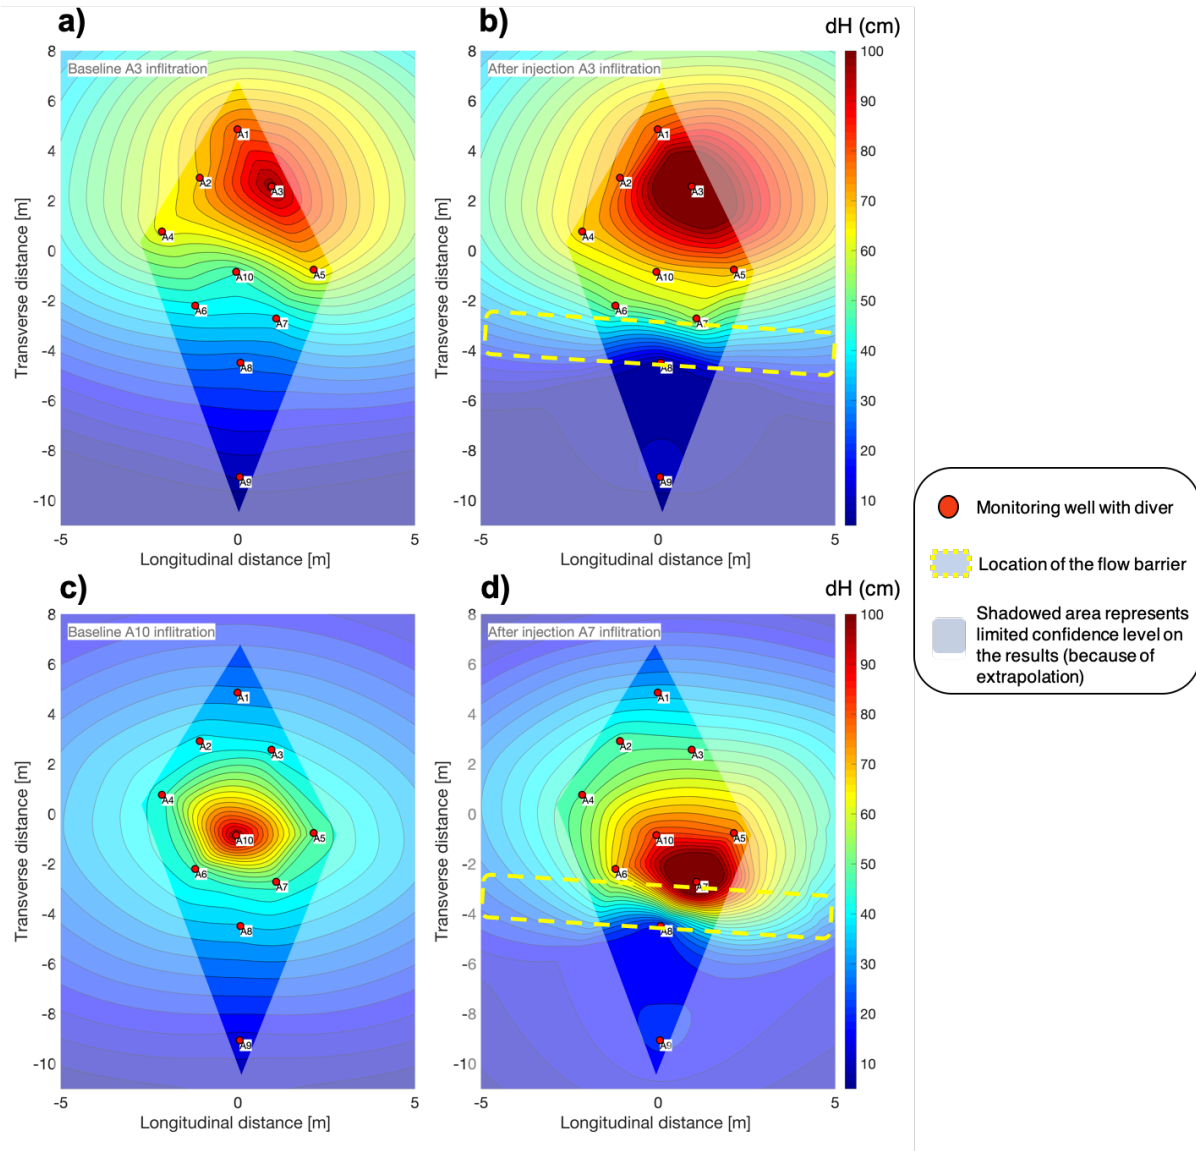

**Fig. S8.** Measured change in hydraulic head (dH) during infiltration tests performed in zone A. a) and b) show results from infiltration test in well A3 before and after the injection of flocs; c) shows the result of an infiltration test performed in well A10 before the injection and d) denotes the test performed in well A7 after the injection.



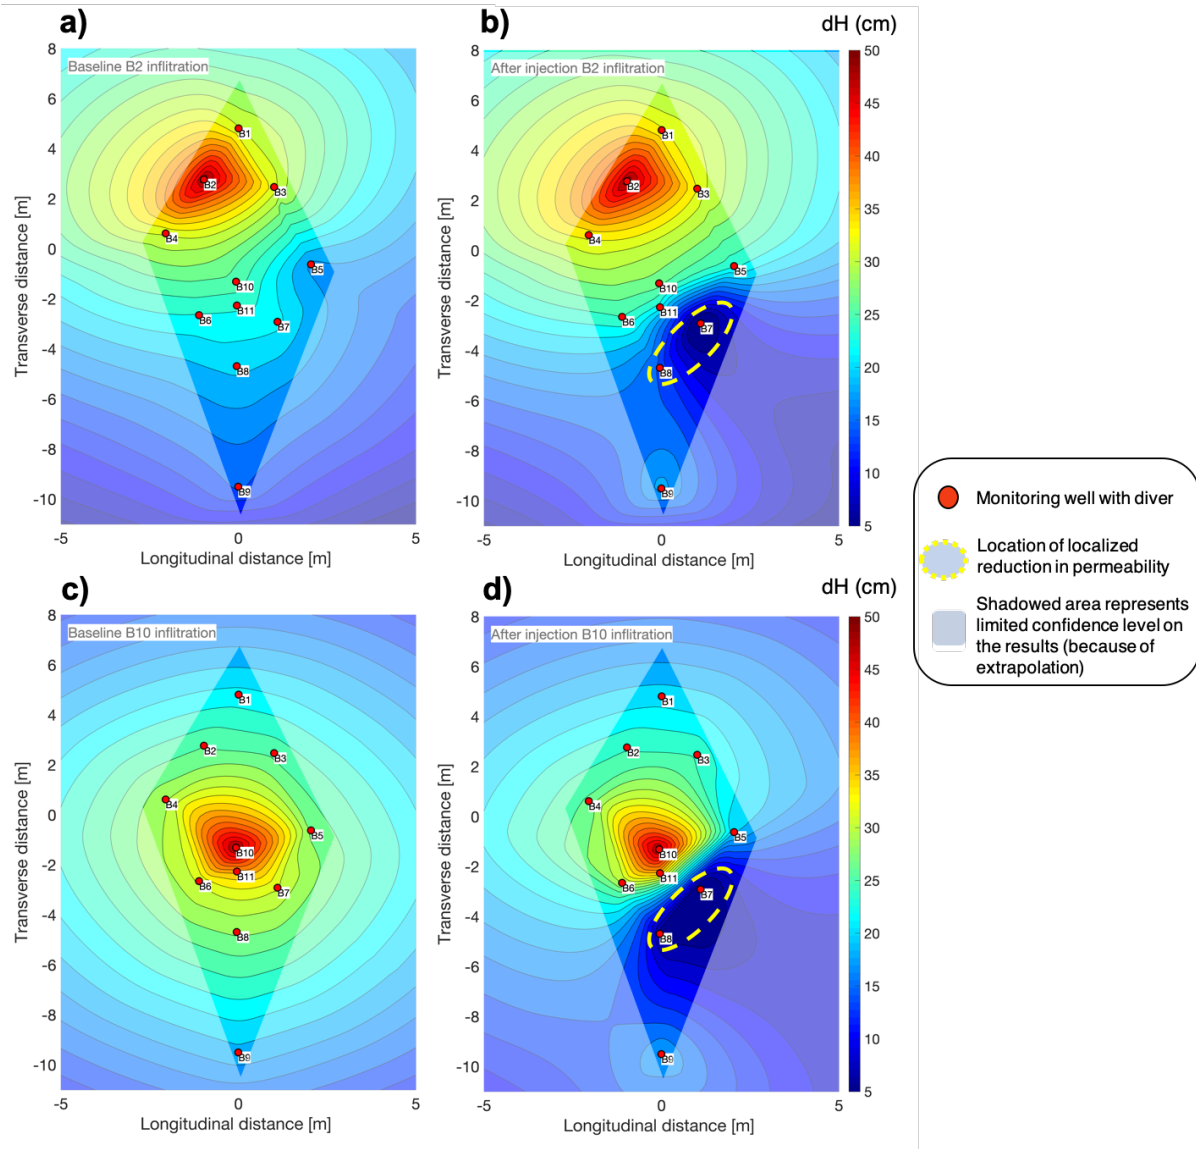

**Fig. S9.** Measured change in hydraulic head (dH) during infiltration tests performed in zone B. a) and b) show results from infiltration test performed in well B2 before and after the injection of flocs; c) and d) denote the infiltration test performed in well B10 before and after the injection.

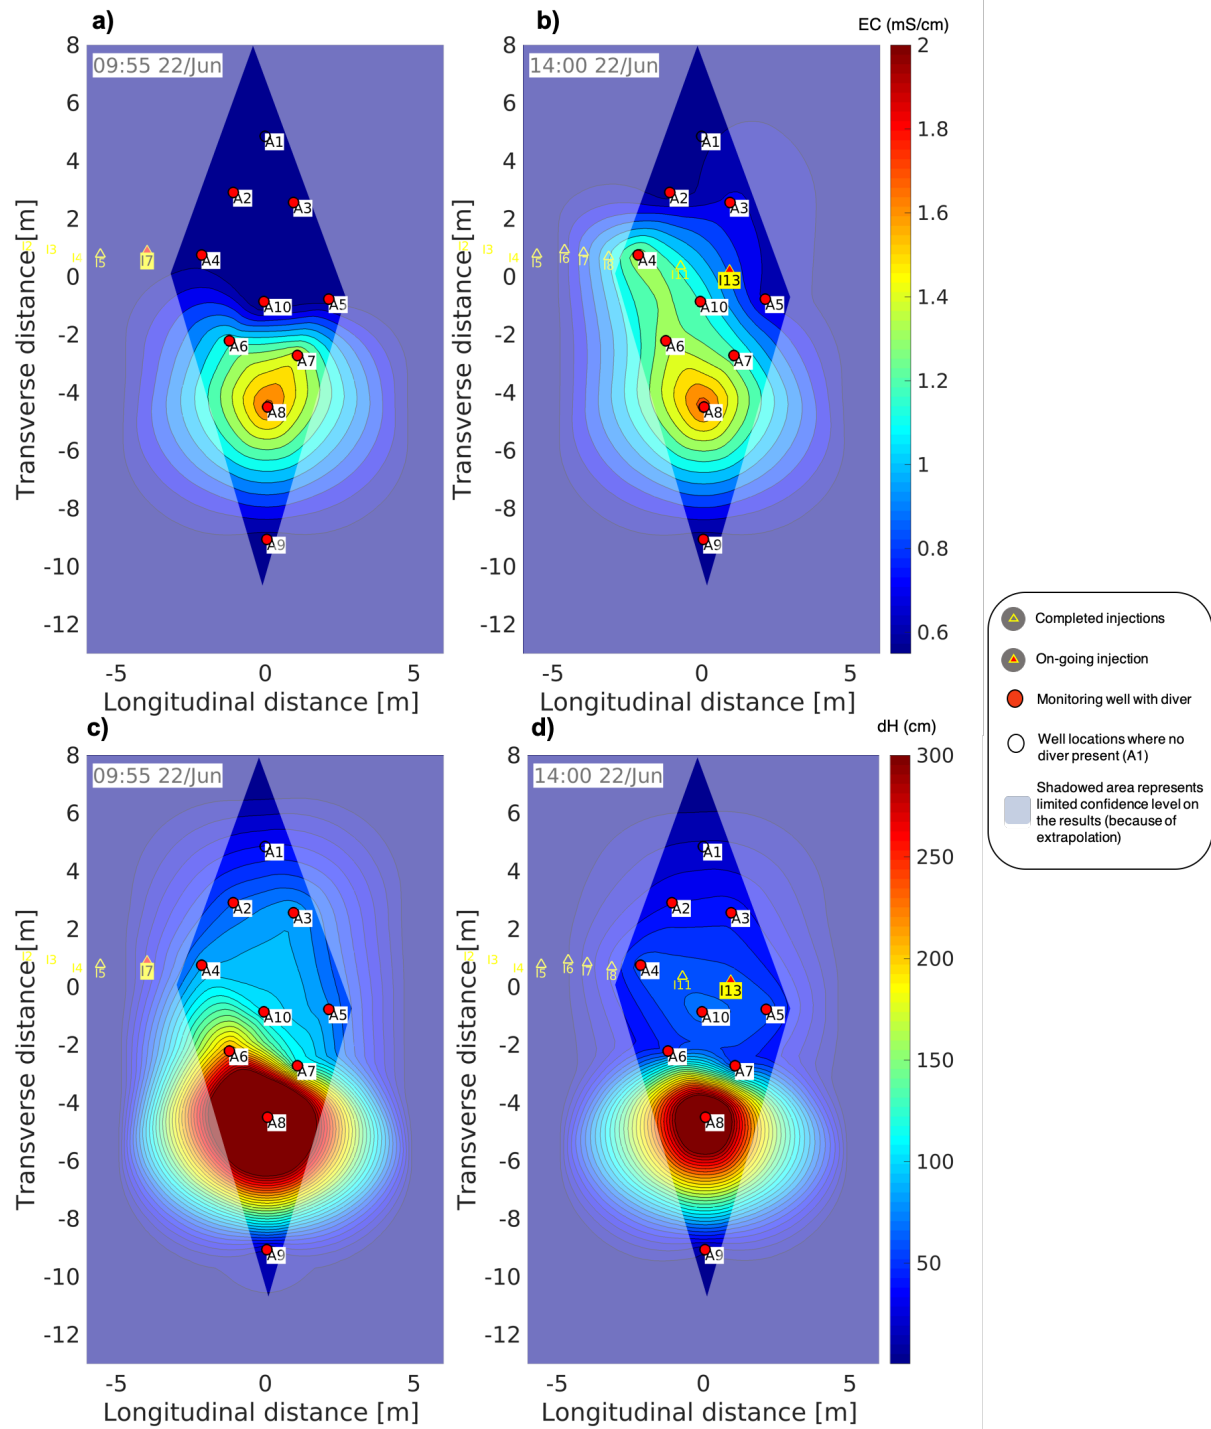

**Fig. S10.** Measured electrical conductivity (EC) (a and b) and change in hydraulic head (dH) (c and d) during the injection of the Al-OM flocs suspension in zone A. Figures a) and c) show the results at the end of the first injection of flocs of a day (I7), and b) and d) show the last injection of the day (I13). The injection sequence of that day is I7->I6->I8->I11->I13.

a)

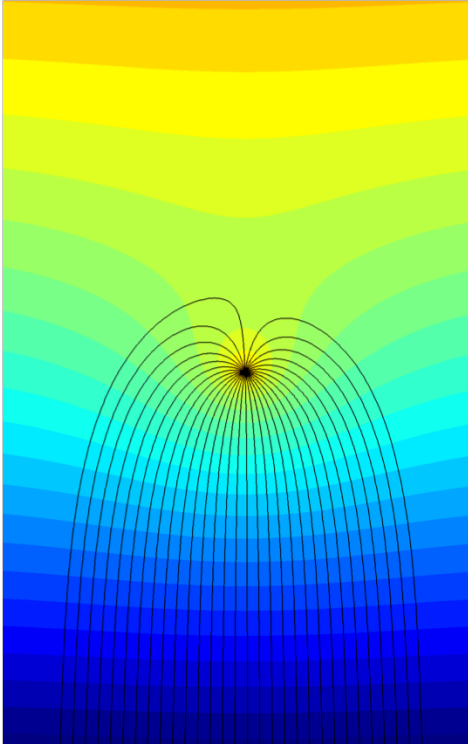

b)

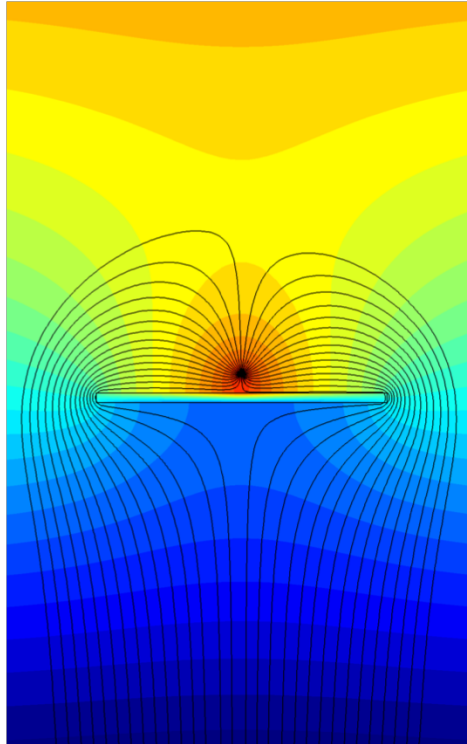

**Fig. S11.** Illustration of the effect of a flow barrier on the infiltration test. a) is without a flow barrier and 2) includes a flow barrier. The color denotes the hydraulic head and black line denote the streamline.

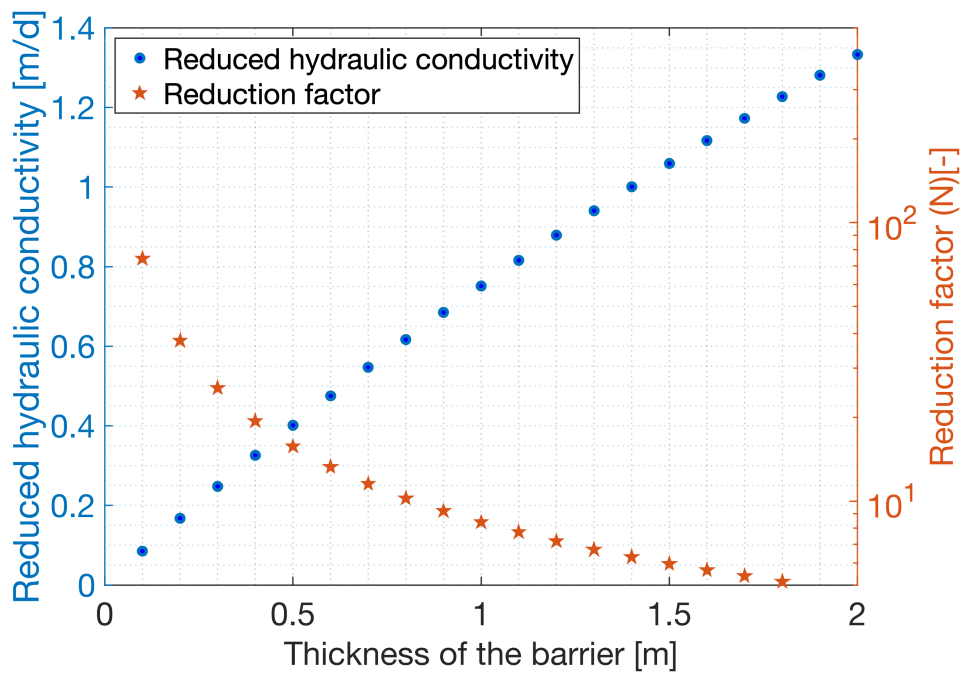

**Fig. S12.** The value of the reduced hydraulic conductivity as a function of the assumed thickness of the flow barrier.
